# Supplementary material
Source: publisher figshare collection journal article supplement (https://gsajournals.figshare.com/ndownloader/files/17869274)
Supplement: Supplementary file 1 [file 17869274]

**Supplementary Information 5**

Imputation accuracy values across individual animals were normally distributed for the 200 SNPs panel. The distribution became increasingly negatively skewed for higher densities.

**Figure S5.**

**
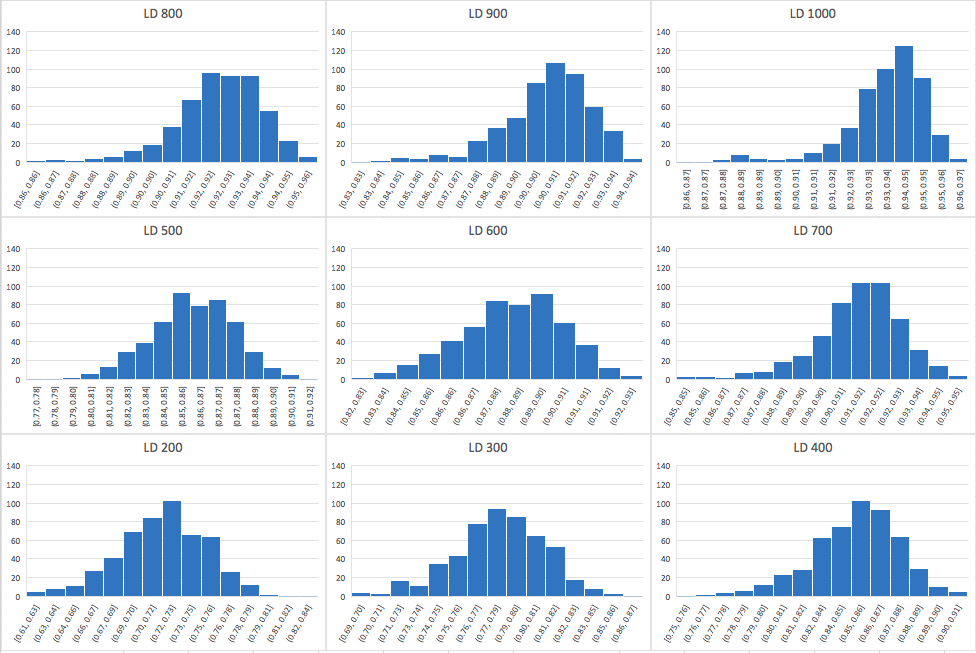
**
